# Supplementary material for: Electronic regulation of carbon sites by oxygenated groups for electrochemical oxygen reduction to H2O2
Source: Royal Society of Chemistry journal article supplement (doi:10.1039/d4ta02266a), 2024-01-01
Supplement: d4ta02266a1.pdf [file d4ta02266a1.pdf]

## Supporting Information for

# Electronic Regulation of Carbon Site by Oxygenated Groups for Electrochemical Oxygen Reduction to H<sub>2</sub>O<sub>2</sub>

Yin Wang<sup>1\*, a</sup>, Tingting Zhang<sup>1, a</sup>, Dongyong Li<sup>1, a</sup>, Peihe Li<sup>a</sup>, Quanli Hu<sup>a</sup>, Quan Zhuang<sup>\*, a</sup>, Limei Duan<sup>a</sup>, Jinghai Liu<sup>\*, a</sup>

<sup>a</sup>Inner Mongolia Key Laboratory of Solid State Chemistry for Battery, Inner Mongolia Engineering Research Center of Lithium-Sulfur Battery Energy Storage, College of Chemistry and Materials Science, Inner Mongolia Minzu University, Tongliao 028000, People's Republic of China.

<sup>1</sup>These authors contributed equally to this work

E-mail: [ywang@imun.edu.cn](mailto:ywang@imun.edu.cn); [jhliu2015@imun.edu.cn](mailto:jhliu2015@imun.edu.cn); [zhuangquan21@outlook.com](mailto:zhuangquan21@outlook.com)

## **Experimental sections**

### **Materials**

All the chemical reagents were used directly without further purification. Ketjen Black (KB, Carbon ECP 600JD) was purchased from Lion Corporation. Supper P (SP) was purchased from TIMCAL Graphite & Carbon. Graphite Carbon (GC) was purchased from Wuxi Hengtai Metal Materials Co., Ltd.. Nafion aqueous (5 wt% in water) was purchased from Dupont Corporation. Potassium hydroxide (KOH), sulphuric acid (H<sub>2</sub>SO<sub>4</sub>, 98%), hydrogen peroxide aqueous (H<sub>2</sub>O<sub>2</sub>, 30 wt% in water), cerium sulfate (Ce(SO<sub>4</sub>)<sub>2</sub>) were purchased from Sinopharm Chemical Reagent Co. Ltd..

### **Synthesis of KB-Ox**

1 g of KB was mixed with 2 mL of deionized water, then the mixture was placed into a tube furnace and heated to 350 °C under air atmosphere for 2 h, the heating rate was 5 °C/min. After cooling down to the room temperature naturally, the KB-Ox was obtained.

### **Synthesis of KB-Re**

1 g of KB was placed into a tube furnace and heated to 1100 °C under Ar atmosphere for 2 h, the heating rate was 5 °C/min. After cooling down to the room temperature naturally, the KB-Re was obtained.

### **Synthesis of KB-Ox2, KB-Re2, SP-Ox and GC-Ox**

KB-Ox2 was synthesized as the method of KB-Ox with the KB-Re as the precursor. KB-Re2 was synthesized as the method of KB-Re with the

KB-Ox as the precursor.

SP-Ox and GC-Ox were synthesized as the preparation of KB-Ox using SP and GC as the precursors.

### **Physical and chemical characterizations**

Scanning electron microscope (SEM) was performed on a S4800 (HITACHI) at an accelerating voltage of 5 kV. Transmission electron microscope (TEM) was measured on a JEM-F200 (JEOL) at an accelerating voltage of 200 kV. N<sub>2</sub> adsorption-desorption isotherms were recorded on a Quadrasorb SI (Quantachrome). The specific surface area was analyzed by the method of Brunauer-Emmett-Teller (BET), the pore distribution was calculated by the non-local density functional theory (NLDFIT) method. X-ray diffraction (XRD) pattern was recorded on a SmartLab (Rigaku) with graphite-monochromatized Cu K $\alpha$  radiation (9 kW,  $\lambda = 0.1541$  nm; scan speed of 6 °/min;  $2\theta = 10-80$  °) at room temperature. Raman spectra were recorded on an Invia (Renishaw) with a 632 nm laser (scanning range of 1000-2000 cm<sup>-1</sup>). NH<sub>3</sub> temperature programmed desorption (NH<sub>3</sub>-TPD) were carried out on a ChemBET (Quantachrome) with the desorption temperature of 50-800 °C. Oxygen (O<sub>2</sub>) adsorption isotherms were recorded on an aperture analyzer (ASAP2460, Micromeritics) at 25 °C. X-ray photoelectron spectroscopy (XPS) measurements were conducted on an AXIS SUPRA (Kratos) using Al K $\alpha$  radiation as the X-ray source (1486.7 eV) with the pass energy of

30 eV. Static water contact angles were recorded on a JC8000DM (Shanghai Zhongchen Digital Technology Apparatus Co., Ltd.). Element analysis (EA) were carried out using a Vario EL cube elemental analyzer. Electron paramagnetic resonance (EPR) were conducted on an EMX Plus (Bruker) under ambient room temperature.

### **Electrode preparations**

Electrochemical 2eORR measurements were performed through a rotating ring disk electrode (RRDE, AFE6R2GCPT, disk area: 0.2375 cm<sup>2</sup>, ring area: 0.2356 cm<sup>2</sup>, collection efficiency: 38 %). H<sub>2</sub>O<sub>2</sub> productions were carried out in a H-type cell with a carbon paper (CP, NOS1005, CeTech) as the working electrode.

RRDE preparation: 2 mg of catalyst was dispersed into a mixed solution (700 μL deionized water, 270 μL ethanol and 30 μL Nafion aqueous), and a homogeneous suspension ink was obtained after the mixture sonicated for 4 h. Then, 10 μL of suspension ink was dropped onto the risk electrode and dried under ambient condition. The loading mass of catalyst on the risk electrode is 0.08 mg cm<sup>-2</sup>.

CP preparation: 8 mg of KB-Ox was dispersed into a mixed solution (950 μL ethanol and 50 μL Nafion) by sonication for 1 h to form a homogeneous ink. Then, 50 μL of the catalyst ink was dropped onto a 1 × 1 cm of CP and dried under ambient condition. The loading mass of catalyst on the CP is 0.4 mg cm<sup>-2</sup>.

## Electrochemical characterization

Electrochemical tests were performed on a Bio-Logic VMP-3 multichannel electrochemical workstation. The RRDE with catalyst was used as the working electrode, a Pt wire as the counter electrode and a KCl saturated Ag/AgCl as the reference electrode. A 0.1 mol/L KOH solution (pH = 13) was used as the ORR electrolyte. Firstly, 10 cycles of cyclic voltammetry (CV) in N<sub>2</sub>-saturated electrolytes were performed on disk electrode with the sweeping potential between 0.2 V and 1.3 V vs. reversible hydrogen electrode (RHE). The scan rate was 100 mV s<sup>-1</sup>. Then, the electrolyte was purged with O<sub>2</sub> for 30 min before ORR test, the oxygen reduction current of disk electrode was measured by linear sweep voltammetry (LSV) with the potential from 1.3 V to 0.2 V vs. RHE at a scan rate of 5 mV s<sup>-1</sup>. During the testing process, a constant potential of 1.2 V vs. RHE was applied on the ring electrode to test the H<sub>2</sub>O<sub>2</sub> formed on the disk electrode, the H<sub>2</sub>O<sub>2</sub> oxidation current of ring electrode was used to evaluate the ORR selectivity. The rotation speed of RRDE is setup to 1600 rpm. The transferred electrons transfer number ( $n_{RRDE}$ ) and the H<sub>2</sub>O<sub>2</sub> yield of catalysts were calculated as the follow equations:

$$n_{RRDE} = 4 \frac{I_D}{I_D + I_R/N} \quad (1)$$

$$H_2O_2 \text{ yield (\%)} = 200 \frac{I_R/N}{I_D + I_R/N} \quad (2)$$

$I_R$  is the ring current,  $I_D$  is the disk current and N is the collection

efficiency ( $N = 0.38$ ) of RRDE.

The potential vs. RHE is calculated according to the Nernst equation as follow:

$$E(vs.RHE) = E(vs.Ag/AgCl) + 0.197 + 0.0592 * pH \quad (3)$$

### **H<sub>2</sub>O<sub>2</sub> concentration measurements**

Electrocatalytic H<sub>2</sub>O<sub>2</sub> production was performed in an H-type cell with a Nafion 211 membrane as the separator between the cathode cell and anode cell. Each cell was filled with 35 mL 0.1 M KOH as the electrolyte. For the cathode compartment, the as-prepared carbon paper as the working electrode and a KCl saturated Ag/AgCl electrode as the reference electrode. For the anode compartment, a Pt sheet (1 × 1 cm) electrode as the counter electrode. Before the electrochemical test, O<sub>2</sub> was bubbled into the cathode compartment for 30 min removing the air. The chronoamperometry method was used to produce H<sub>2</sub>O<sub>2</sub>, a potential of 0.5 V versus RHE was applied.

The H<sub>2</sub>O<sub>2</sub> concentration was measured by an ultraviolet-visible (UV-Vis) spectrometry (UV2310II, Techcomp) with a cerium sulfate (Ce(SO<sub>4</sub>)<sub>2</sub>) solution (100 mM of Ce(SO<sub>4</sub>)<sub>2</sub>) as the chromogenic reagent. 1 mL of catholyte after electrochemical test and 3 mL of Ce(SO<sub>4</sub>)<sub>2</sub> solution were mixed and placed under dark condition for 10 min, the mixed solution was measured using the UV-Vis spectrometry between 420 ~ 540 nm, the absorbance at 480 nm was used to calculate the H<sub>2</sub>O<sub>2</sub> concentration

according to the calibration curve (Figure S4). The H<sub>2</sub>O<sub>2</sub> faradaic efficiency (FE<sub>H<sub>2</sub>O<sub>2</sub></sub>) was calculated as the equation 4:

$$FE_{H_2O_2} = \frac{2 \times F \times C_{H_2O_2} \times V}{Q} \times 100\% \quad (4)$$

Where C<sub>H<sub>2</sub>O<sub>2</sub></sub> is the measured molar concentration of H<sub>2</sub>O<sub>2</sub> (mmol/L), V is the volume of electrolyte in cathode chamber (0.035 L), F is the Faraday constant (96485 C/mol) and Q is the total charge passed during the electrocatalytic reaction.

### **Computational Methods**

The density functional theory (DFT) calculations were performed using Vienna *ab initio* Simulation Package (VASP).<sup>1</sup> The interaction between electron and ion nuclei is described by using the projected augmented wave (PAW) method.<sup>2</sup> The Broyden-Goldfarb-Shanno (BFGS) error estimation function and van der Waals correlation (BEEF-vdW) function are adopted to precisely describe the properties on graphene.<sup>3</sup> The plane-wave kinetic energy cutoff of 400 eV with a Gaussian smearing width of 0.1 eV, and Monkhorst–Pack *k*-point grids of 1 × 4 × 1 were adopted to ensure the convergence of the total-energy calculations. Furthermore, the convergence for total energy and interaction force was set to be 10<sup>-4</sup> eV and 10<sup>-2</sup> eV Å<sup>-1</sup>, respectively. The structure of the model was constructed by connecting different functional groups (-OH, -CHO, -COOH) on the edge of 4 × 5 supercell of a single layer graphite orthogonal single cell, along with a vacuum layer of 20 Å in the Z direction to avoid periodic interactions. Device Studio program provides a number of functions for performing visualization, modeling and simulation.<sup>4</sup> The electronic localized function (ELF) and electronic density states (DOS) were performed by DS-PAW software integrated in Device

Studio program.<sup>5</sup>

The model structures were used to model the 2eORR reaction pathway:

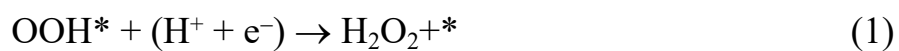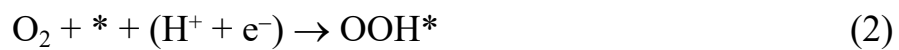

Where \* represents the active sites. The overpotential is determined by either the first proton-electron transfer to form OOH\* or the second electron transfer to form H<sub>2</sub>O<sub>2</sub>. Obviously, the intermediate OOH\* plays a key role in the 2eORR.



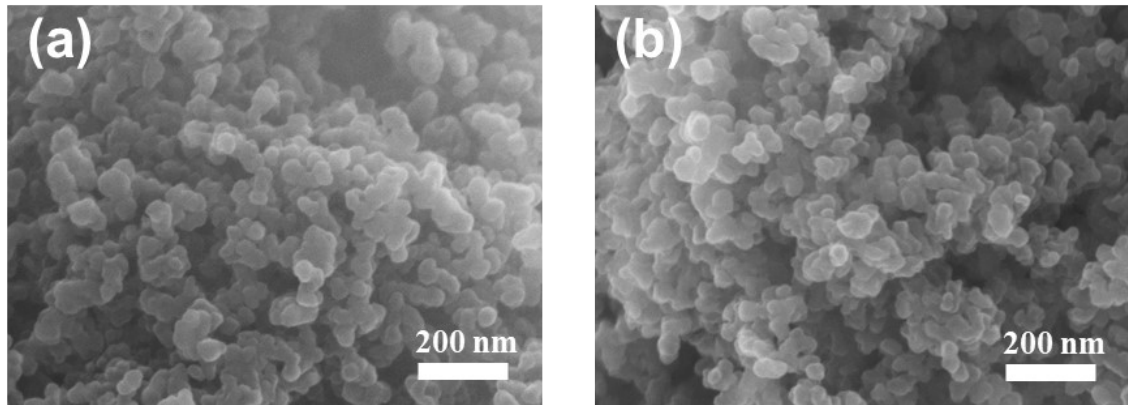

**Figure S1.** SEM images of (a) KB and (b) KB-Re

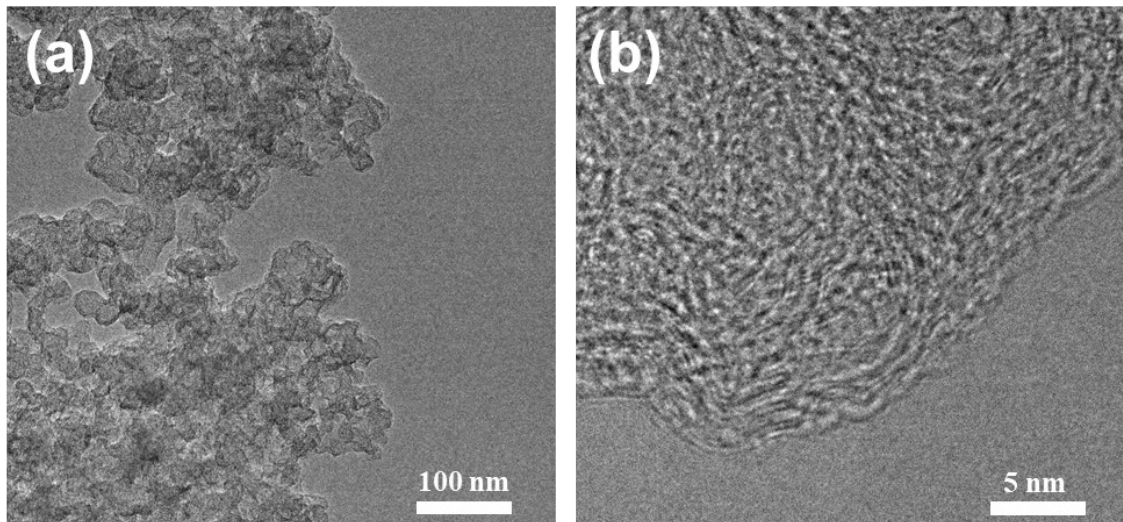

**Figure S2.** (a) TEM image and (b) HRTEM image of KB.

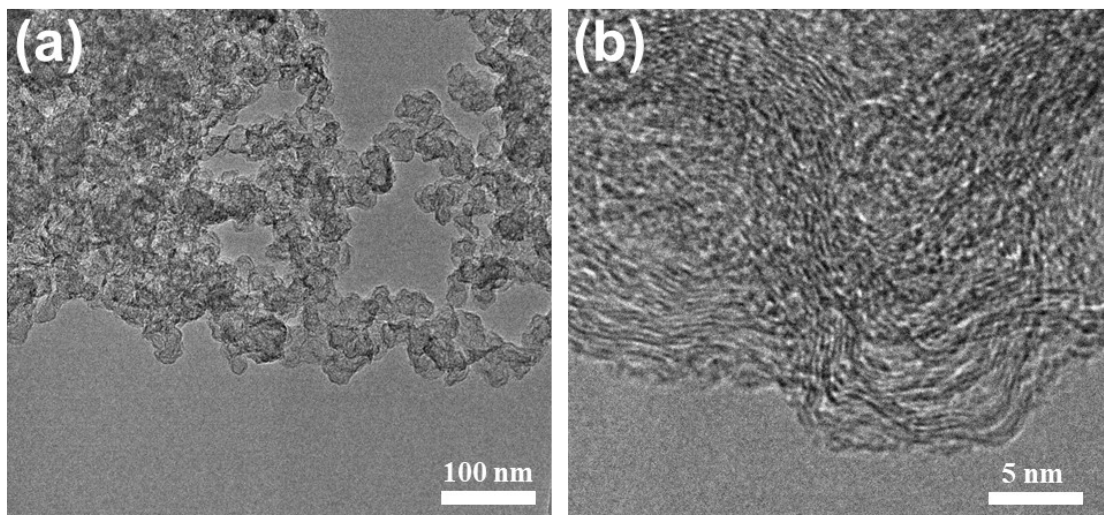

**Figure S3.** (a) TEM image and (b) HRTEM image of KB-Re.

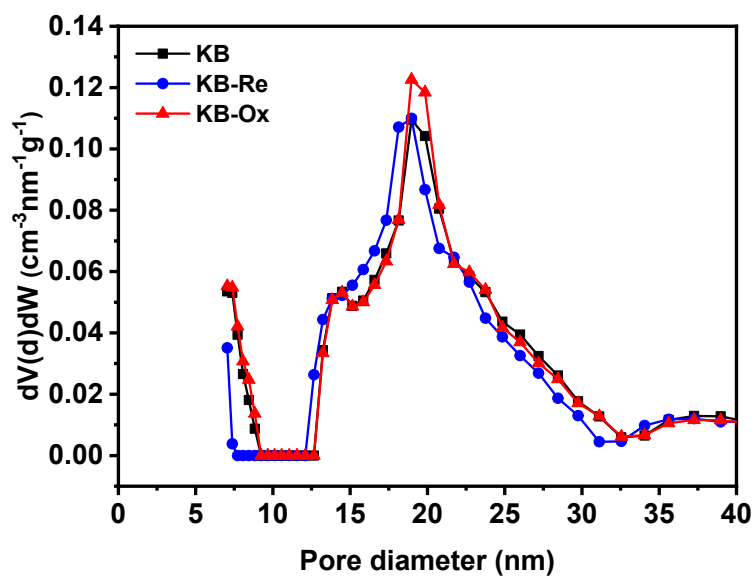

**Figure S4.** Pore size distributions of KB, KB-Re and KB-Ox.

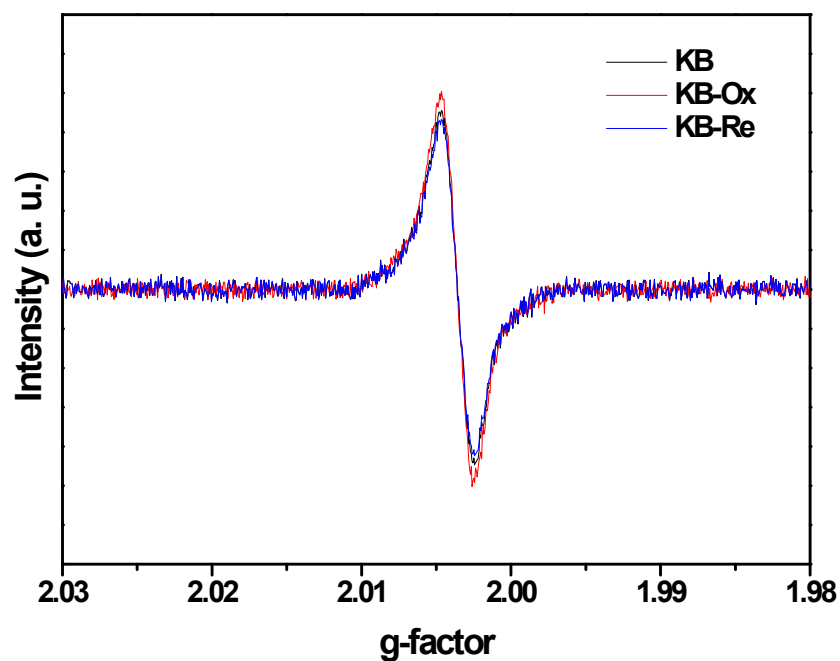

Figure S5. EPR spectra of KB, KB-Re and KB-Ox.

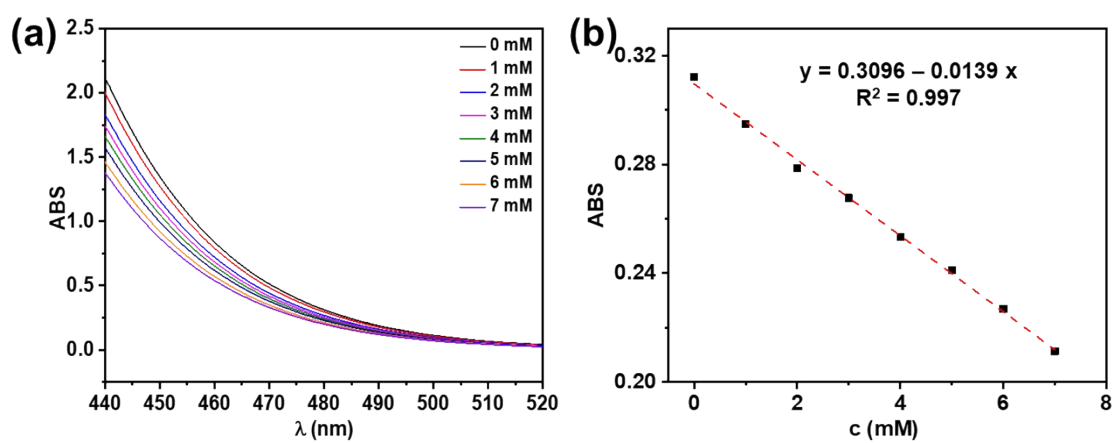

Figure S6. (a) UV-Vis spectra and (b) the calibration curve for standard solutions of  $\text{H}_2\text{O}_2$ .

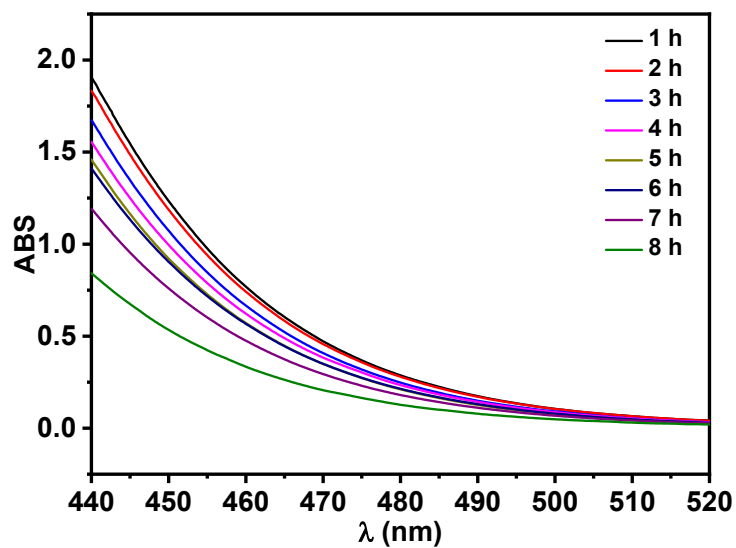

Figure S7. UV-Vis spectra of  $\text{H}_2\text{O}_2$  during 8 h electrolysis.

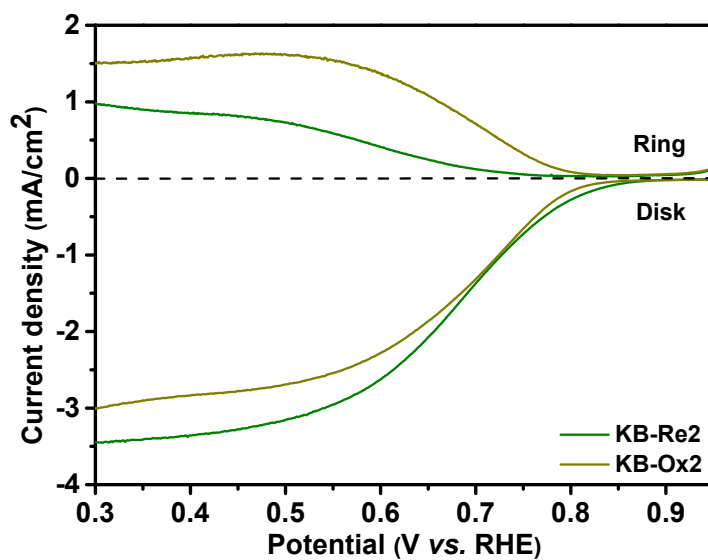

Figure S8. RRDE voltammograms at 1600 rpm in  $\text{O}_2$ -saturated 0.1 mol/L KOH electrolyte of KB-Re2 and KB-Ox2.

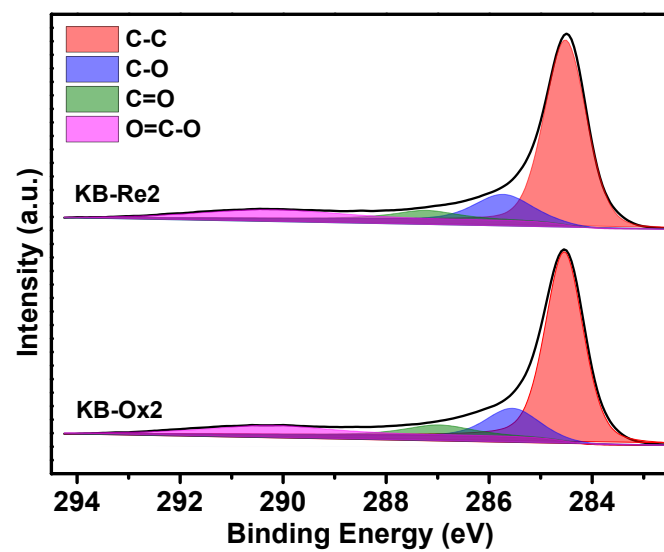

**Figure S9.** C 1s XPS spectra of KB-Re2 and KB-Ox2.

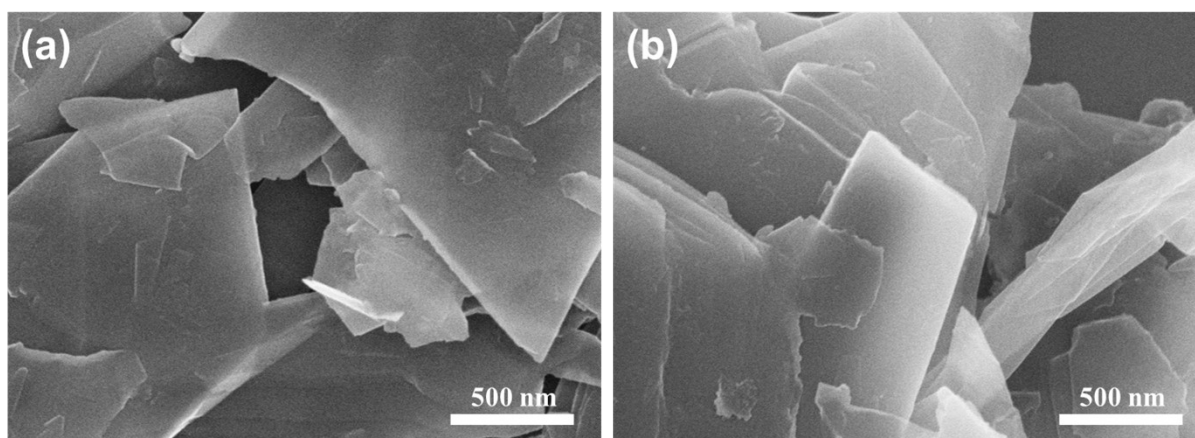

**Figure S10.** SEM images of (a) GC and (b) GC-Ox.

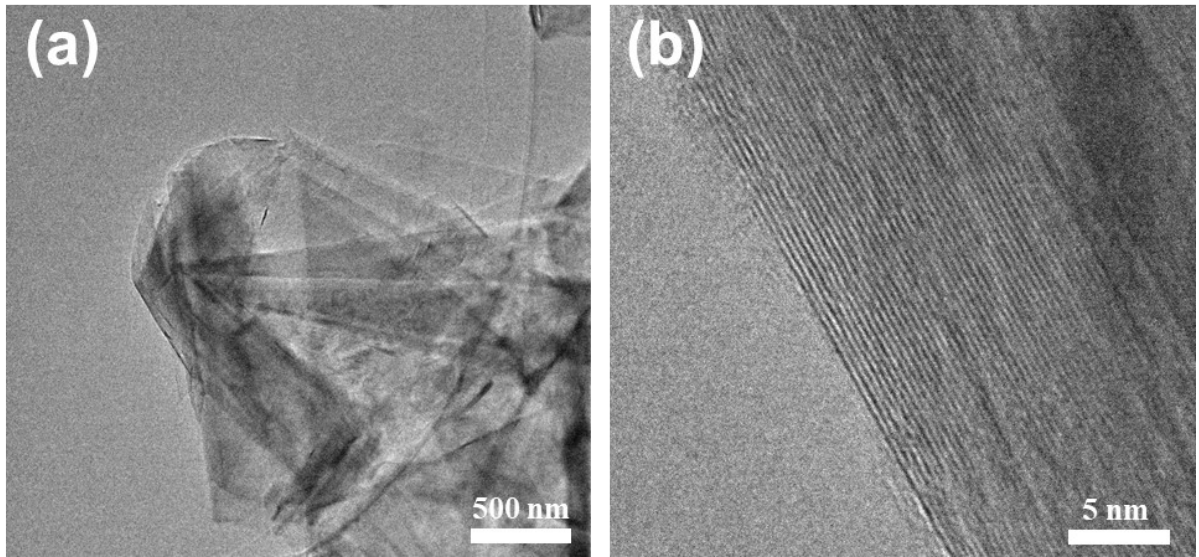

**Figure S11.** (a) TEM image and (b) HRTEM image of GC.

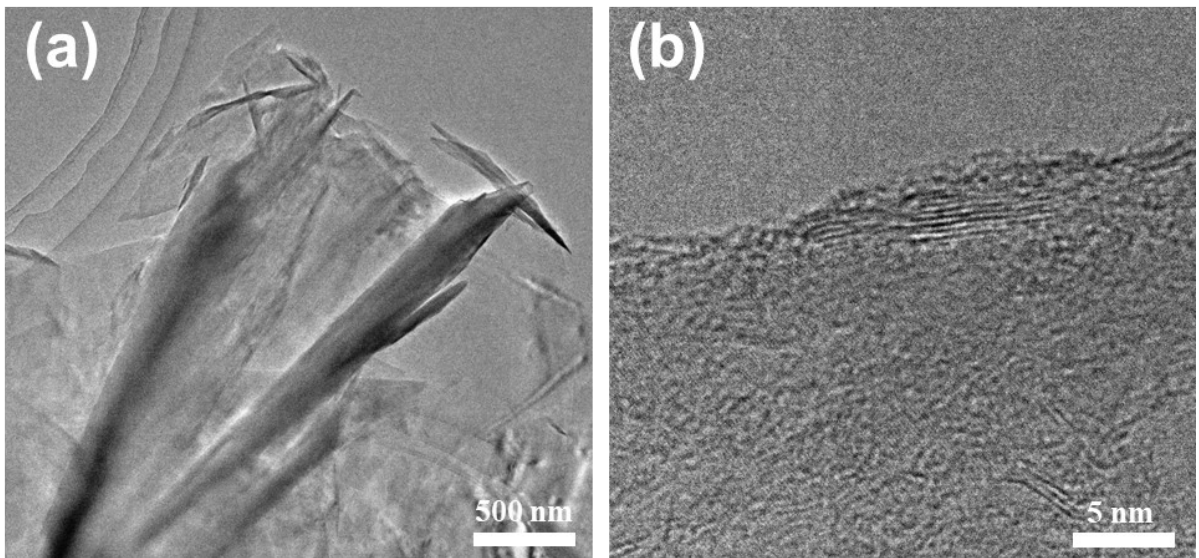

**Figure S12.** (a) TEM image and (b) HRTEM image of GC-Ox.

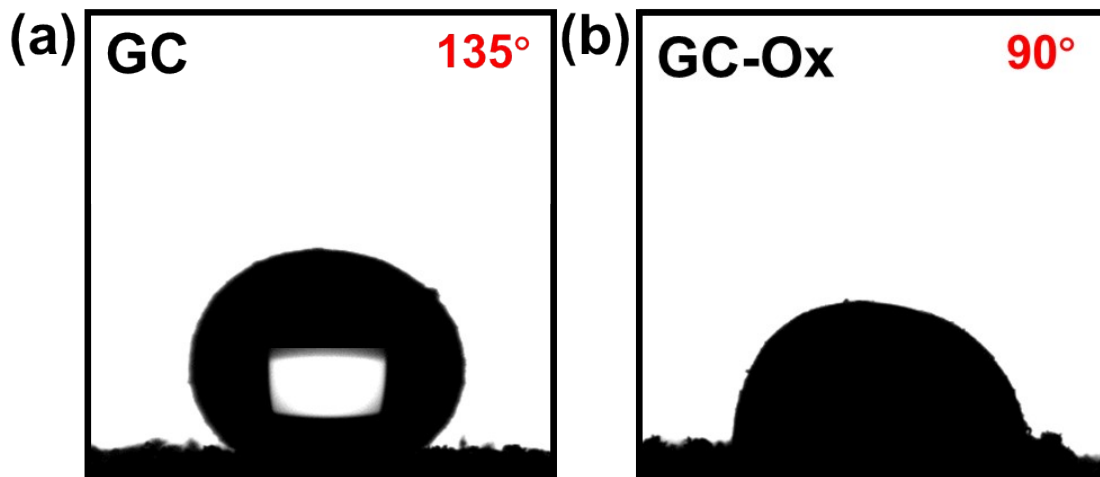

Figure S13. Contact angles with 0.1 mol/L KOH solution of (a) GC and (b) GC-Ox.

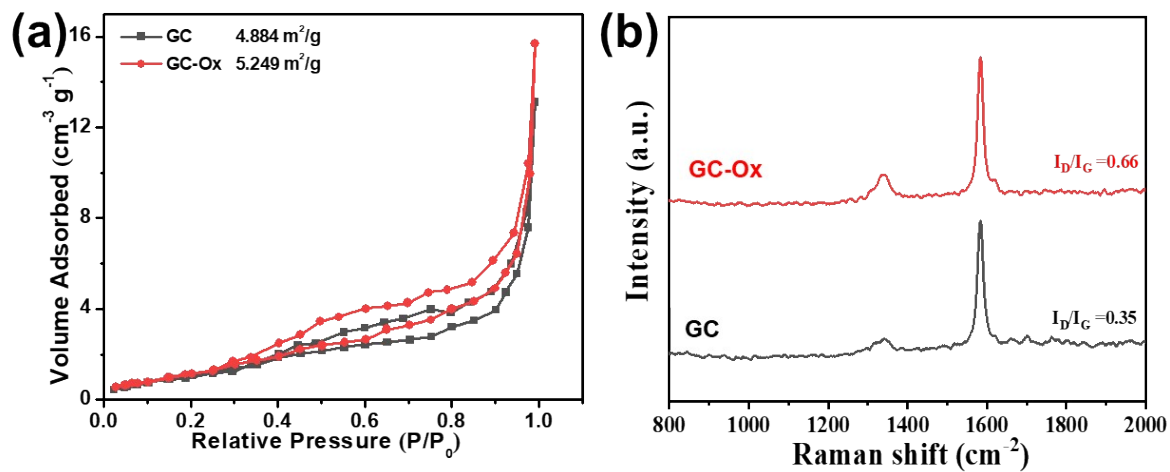

Figure S14. (a)  $N_2$  adsorption-desorption isotherms and (b) Raman spectra of GC and GC-Ox.



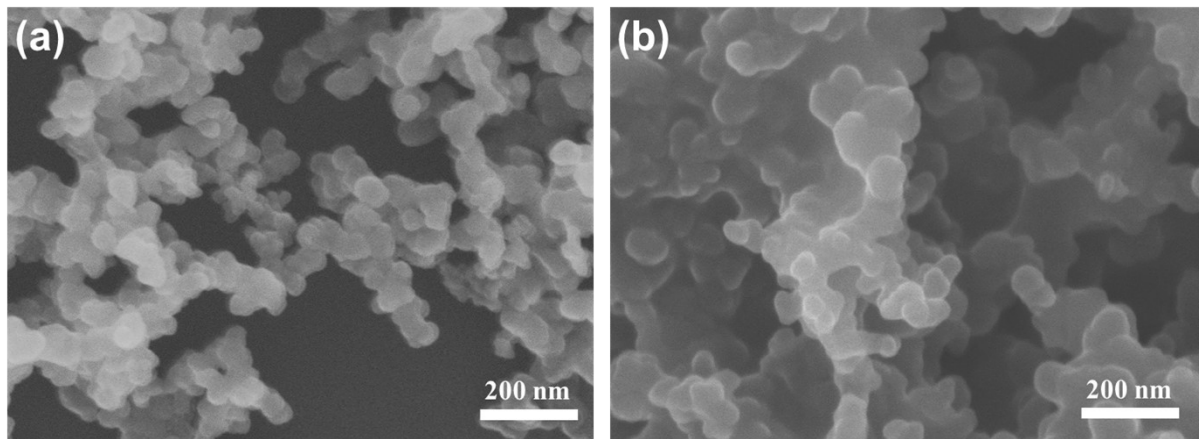

**Figure S15.** SEM images of (a) SP and (b) SP-Ox.

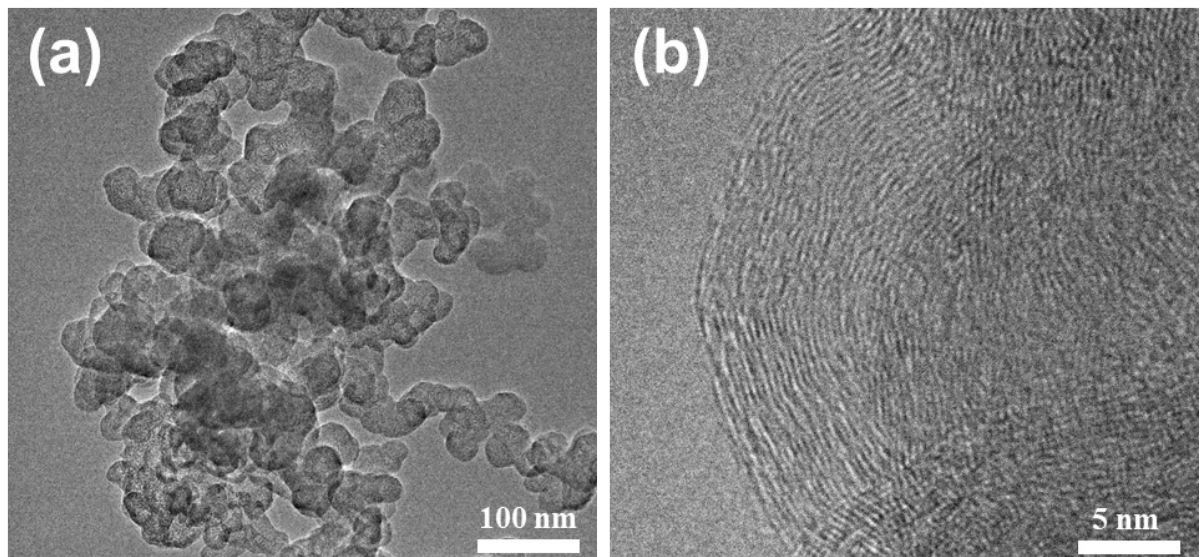

**Figure S16.** (a) TEM image and (b) HRTEM image of SP.



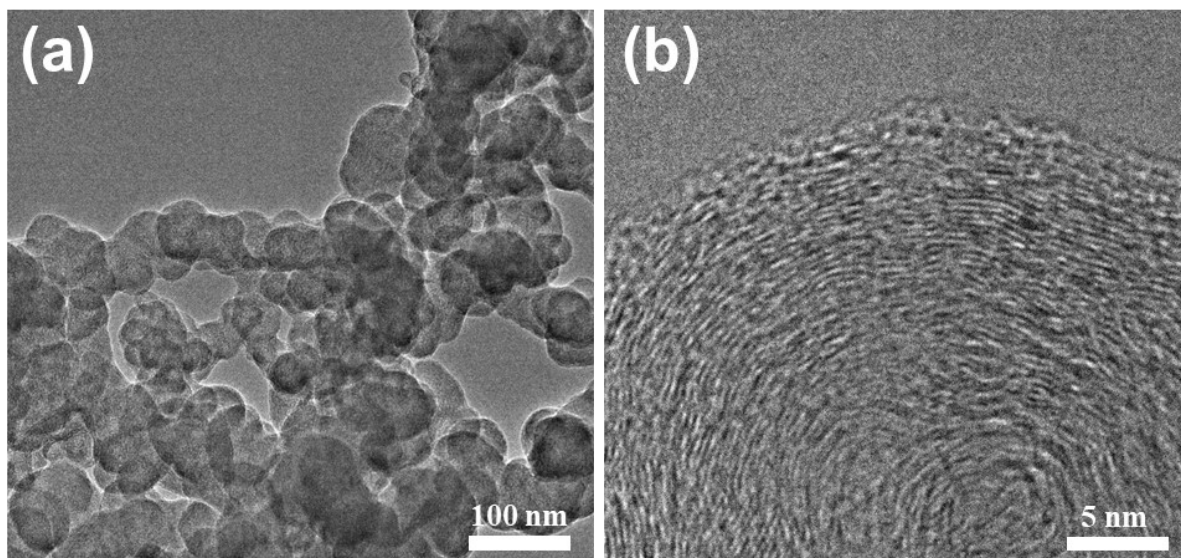

**Figure S17.** (a) TEM image and (b) HRTEM image of SP-Ox.

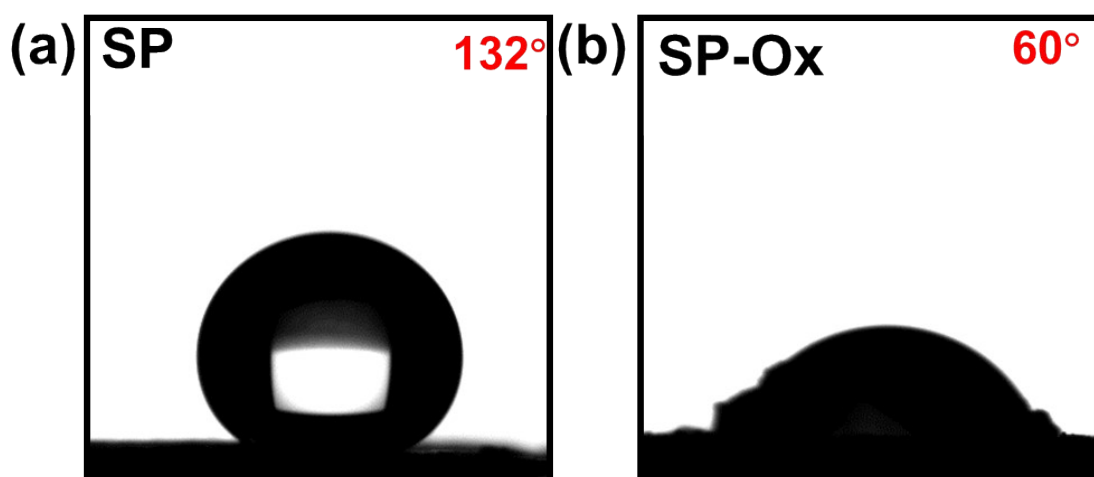

**Figure S18.** Contact angles with 0.1 mol/L KOH solution of (a) SP and (b) SP-Ox.

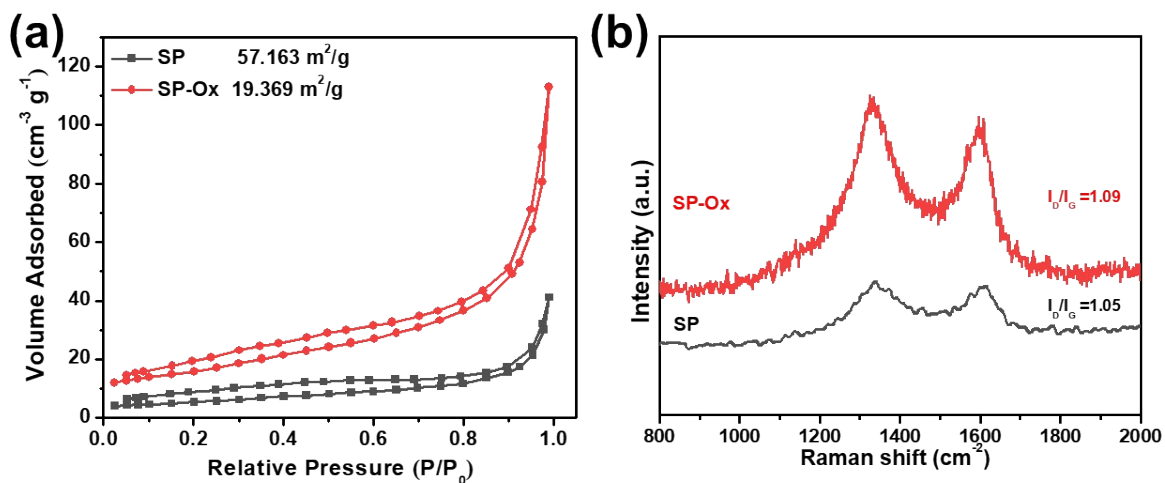

**Figure S19.** (a) N<sub>2</sub> adsorption-desorption isotherms and (b) Raman spectra of SP and SP-Ox.

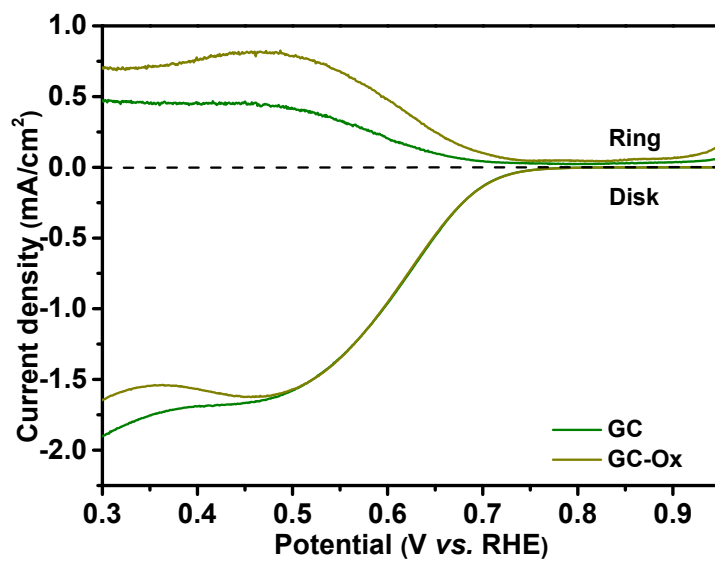

**Figure S20.** RRDE voltammograms at 1600 rpm in O<sub>2</sub>-saturated 0.1 mol/L KOH electrolyte of GC and GC-Ox.

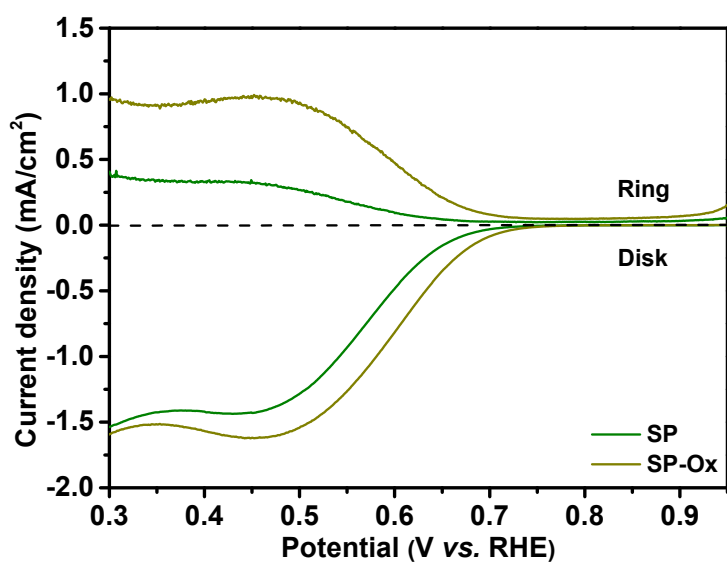

**Figure S21.** RRDE voltammograms at 1600 rpm in O<sub>2</sub>-saturated 0.1 mol/L KOH electrolyte of SP and SP-Ox.

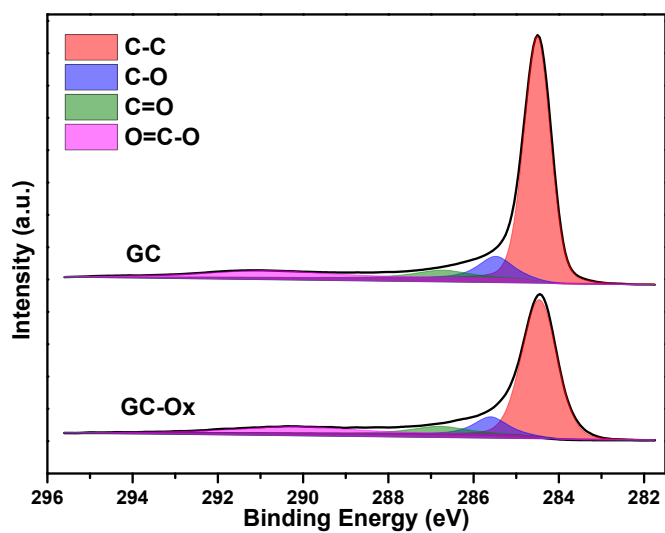

**Figure S22.** C 1s XPS spectra of GC and GC-Ox.

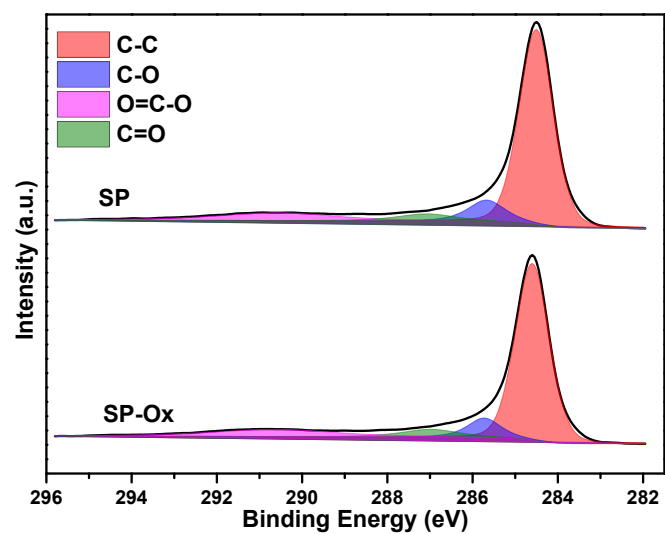

**Figure S23.** C 1s XPS spectra of SP and SP-Ox.

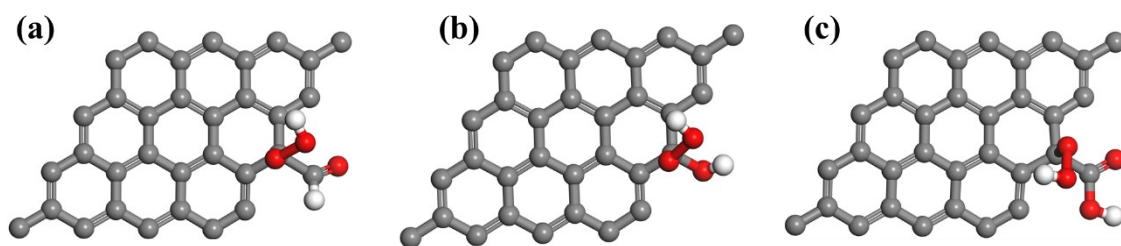

**Figure S24.** The OOH\* adsorption model onto the configurations of (a) Edge-CHO, (b) Edge-OH and (c) Edge-COOH. Color code: C, gray; O, red; H, white.

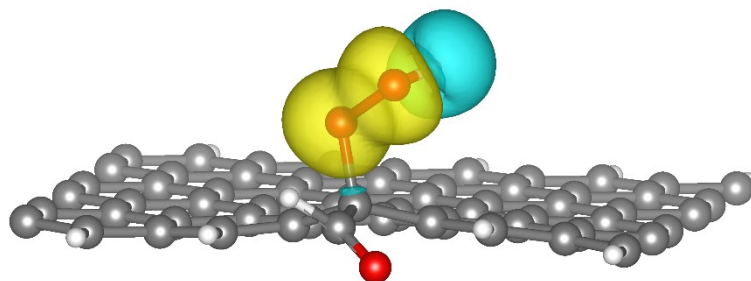

**Figure S25.** Differential charge densities of the Edge-CHO model with highest 2eORR activity. Cyan and yellow isosurfaces donating electron losing and gaining, respectively.

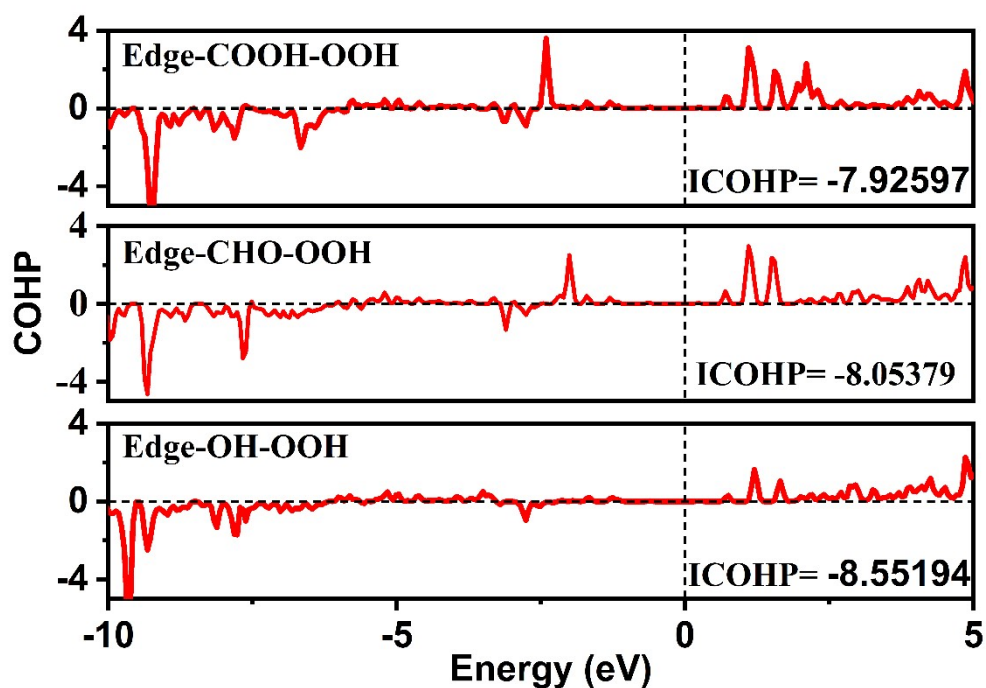

**Figure S26.** The COHP for C-O interactions for -OOH adsorption on Edge-CHO, Edge-OH and Edge-COOH. Bonding and antibonding states are shown on the bottom and top, respectively.

**Table S1.** Element compositions determined by element analysis (EA) and X-ray photoelectron spectroscopy (XPS) of KB, KB-Ox and KB-Re

| Method  | EA         |            |                 | XPS        |            |                 |
|---------|------------|------------|-----------------|------------|------------|-----------------|
| Element | C<br>(at%) | O<br>(at%) | O/C<br>(at/at)% | C<br>(at%) | O<br>(at%) | O/C<br>(at/at)% |
| KB      | 97.5       | 2.5        | 2.56            | 98.6       | 1.4        | 1.42            |
| KB-Ox   | 96.1       | 3.9        | 4.03            | 97.8       | 2.1        | 2.15            |
| KB-Re   | 98.2       | 1.8        | 1.84            | 98.9       | 1.1        | 1.11            |

## Reference

- 1 G. Kresse and J. Furthmuller, *Phys. Rev. B*, 1996, **54**, 11169-11186.
- 2 G. Kresse and D. Joubert, *Phys. Rev. B*, 1999, **59**, 1758-1775.
- 3 J. Wellendorff, K. T. Lundgaard, A. Møgelhøj, V. Petzold, D. D. Landis, J. K. Nørskov, T. Bligaard and K. W. Jacobsen, *Phys. Rev. B*, 2012, **85**, 235149.
- 4 Device Studio, Version 2023A, Hongzhiwei Technology, China, 2024, Available online: <https://iresearch.net.cn/cloudSoftware> accessed on March, 10.
- 5 P. E. Blöchl, *Phys. Rev. B*, 1994, **50**, 17953-17979.
